# Supplementary material for: The Folate Cycle Enzyme MTHFR Is a Critical Regulator of Cell Response to MYC-Targeting Therapies
Source: Oxford University Press journal article supplement (doi:10.1158/2159-8290.cd-19-0970), 2020-08-21
Supplement: 21598290cd190970-sup-227491_2_supp_6471606_qnn3g3.xlsx [file 21598290cd190970-sup-227491_2_supp_6471606_qnn3g3.xlsx]

## Sheet: Feuil1
	Table S4: Characteristics of CBF AML patient samples used in this study.
	Patient ID	Sex	Age	Diagnosis	AML type	FAB	Status	Cytogenetics	CBF Status	FLT3-ITD	FLT3-TKD	Sequencing	Source	Blasts (%)
	1	F	82	AML	De novo	M2	Diagnosis	48,XX,+8,inv(16)(p13q22),+22[1]/48,sl,add(9)(q34)[4]/48,sdl1,add(5)(q3?1)[11]	CBFB-MYH11	N/A	N/A	N/A	Bone Marrow	65
	2	M	63	AML	De novo	M2	Diagnosis	46,XY,invdel(16)(?p?q?22)[24]	CBFB-MYH11	Negative	Negative	IDH2 exon4:c.G419A:p.R140Q, DDX41 exon14:c.C1504T:p.Q502X, U2AF1 exon6:c.A470C:p.Q157P, ASXL1 exon12:c.1927dupG:p.G642fs	Bone Marrow	92
	3	F	46	AML	De novo	M2	Diagnosis	46, XX, t(8;21)(q22;q22)	AML1-ETO	Negative	Negative	N/A	Bone Marrow	22
	4	M	39	AML	De novo	M4eo	Diagnosis	46, XY, inv(16)(p13;q22)	CBFB-MYH11	Negative	Negative	NRAS, p.Gly12Asp	Bone Marrow	77
	5	M	34	AML	De novo	M4eo	Diagnosis	46, XY, inv(16)(p13;q22)	CBFB-MYH11	Negative	Negative	NRAS, p.Gln61His	Bone Marrow	90
	6	M	80	AML	De novo	M4eo	Diagnosis	46,XY,inv(16)(p13q22)	CBFB-MYH11	N/A	N/A	N/A	Bone Marrow	N/A
	7	F	89	AML	De novo	M5b	Diagnosis	46,XX,inv(16)(p13q22)[13]/47,idem,+22[2]	CBFB-MYH11	Negative	Positive	CBL, p.Leu99* ; STAG2, p.Arg1033Pro ; WT1, p.Ser381* ; NRAS, p.Gly12Ser ; FLT3, p.Val491Leu	Bone Marrow	65
	8	M	71	AML	Treatment-Related	M4eo	Diagnosis	46,XY,inv(16)(p13q22)	CBFB-MYH11	Negative	Negative	N/A	Bone Marrow	56
	9	M	83	AML	De novo	M4	Diagnosis	48,XY,+8,inv(16)(p23q22),+22[24]	CBFB-MYH11	Negative	Negative	N/A	Bone Marrow	N/A
	10	M	75	AML	Secondary	CMML2	Diagnosis	46,XY,inv(16)(p1?3q22)[19]/45,idem,-Y	CBFB-MYH11	Negative	Negative	N/A	Bone Marrow	N/A
	11	F	35	AML	De novo	M2	Diagnosis	46,XX,der(2)t(2;11)(q3?3;q13),inv(16)(p13p22)[12]/52,XX,+7,+8,+9,+13,+14,inv(16)(p13q22),+21[7]/46,XX[5]	CBFB-MYH11	Negative	Negative	N/A	Bone Marrow	70
