# Supplementary material for: The Folate Cycle Enzyme MTHFR Is a Critical Regulator of Cell Response to MYC-Targeting Therapies
Source: Oxford University Press journal article supplement (doi:10.1158/2159-8290.cd-19-0970), 2020-08-21
Supplement: 21598290cd190970-sup-227491_2_supp_6471607_qhh3g3.xlsx [file 21598290cd190970-sup-227491_2_supp_6471607_qhh3g3.xlsx]

## Sheet: Data
	Table S5: List of Top Differentially Regulated Metabolites
	Metabolites	Control_Replicate 1	Control_Replicate 2	Control_Replicate 3	Control_Replicate 4	- FA_Replicate 1	- FA_Replicate 2	- FA_Replicate 3	- FA_Replicate 4	Fold-Change	Accession Number	SUPER_PATHWAY	SUB_PATHWAY
	4-guanidinobutanoate	0.0916952	-0.127523	-0.219021	0.213912	1.90956	1.63363	1.41839	1.26131	1.56596	HMDB03464	Amino Acid	Guanidino and Acetamido Metabolism
	cysteine sulfinic acid	-0.225847	0.21641	-0.412088	0.300455	1.75438	1.16568	1.01791	1.04122	1.27506	HMDB00996	Amino Acid	Methionine, Cysteine, SAM and Taurine Metabolism
	S-1-pyrroline-5-carboxylate	0.433781	0.0818316	-0.022829	-0.721256	0.67367	1.24456	1.25461	0.849567	1.06272	HMDB01301	Amino Acid	Glutamate Metabolism
	retinol (Vitamin A)	0.273997	0.156364	-0.18933	-0.323084	1.43567	0.923434	0.993184	0.815638	1.06249	HMDB00305	Cofactors and Vitamins	Vitamin A Metabolism
	aspartate	0.137223	0.121093	-0.0473266	-0.243101	0.820533	0.701832	0.692944	0.438002	0.671356	HMDB00191	Amino Acid	Alanine and Aspartate Metabolism
	methionine sulfoxide	0.209186	0.0612609	-0.0938214	-0.211649	0.746197	0.687134	0.6536	0.292162	0.603529	HMDB02005	Amino Acid	Methionine, Cysteine, SAM and Taurine Metabolism
	inosine 5'-monophosphate (IMP)	0.257828	0.182561	-0.0883625	-0.456333	0.552354	0.635676	0.509727	0.332715	0.533695	HMDB00175	Nucleotide	Purine Metabolism, (Hypo)Xanthine/Inosine containing
	N-acetylglutamate	0.399633	0.149939	-0.210899	-0.499592	0.51485	0.434559	0.446345	0.442097	0.499693	HMDB01138	Amino Acid	Glutamate Metabolism
	5-oxoproline	0.0881458	0.122601	-0.00895712	-0.226864	0.770441	0.559439	0.468414	0.151471	0.49371	HMDB00267	Amino Acid	Glutathione Metabolism
	N-acetylasparagine	-0.140648	0.0670919	-0.116941	0.167543	0.796959	0.665328	0.188693	0.295059	0.492248	HMDB06028	Amino Acid	Alanine and Aspartate Metabolism
	trans-4-hydroxyproline	0.140987	0.167548	-0.122467	-0.22503	0.59856	0.556948	0.486928	0.14377	0.456292	HMDB00725	Amino Acid	Urea cycle; Arginine and Proline Metabolism
	pyridoxine (Vitamin B6)	0.04585	0.179767	-0.0243162	-0.231547	0.600771	0.587634	0.405127	-0.00538664	0.404598	HMDB02075	Cofactors and Vitamins	Vitamin B6 Metabolism
	uridine 5'-triphosphate (UTP)	0.241627	-0.0550524	0.0725463	-0.315551	0.530727	0.40037	0.292842	0.275905	0.389069	HMDB00285	Nucleotide	Pyrimidine Metabolism, Uracil containing
	glutathione, oxidized (GSSG)	0.184604	0.0425556	-0.118991	-0.131745	0.547101	0.435223	0.329835	0.206315	0.385512	HMDB03337	Amino Acid	Glutathione Metabolism
	threonine	0.130659	0.178531	-0.12347	-0.225162	0.548659	0.451002	0.399098	0.0626798	0.37522	HMDB00167	Amino Acid	Glycine, Serine and Threonine Metabolism
	cytidine triphosphate	0.0555958	-0.11779	0.199528	-0.166841	0.65293	0.26941	0.406791	0.140006	0.374661	HMDB00082	Nucleotide	Pyrimidine Metabolism, Cytidine containing
	tyrosine	0.0967008	0.16806	-0.0333835	-0.268813	0.536031	0.388825	0.470732	0.0509869	0.371003	HMDB00158	Amino Acid	Tyrosine Metabolism
	glutamate	0.130949	0.177108	-0.0735857	-0.279113	0.393235	0.44157	0.358402	0.0944598	0.333077	HMDB00148	Amino Acid	Glutamate Metabolism
	S-adenosylhomocysteine (SAH)	0.260404	0.0757853	-0.0406751	-0.365775	0.433486	0.341517	0.28217	0.181993	0.327357	HMDB00939	Amino Acid	Methionine, Cysteine, SAM and Taurine Metabolism
	cytidine diphosphate	0.152997	0.0970781	0.028634	-0.324686	0.409916	0.330941	0.329901	0.0759181	0.298163	HMDB01546	Nucleotide	Pyrimidine Metabolism, Cytidine containing
	uridine 5'-diphosphate (UDP)	0.129985	0.0270749	0.0647924	-0.250098	0.429386	0.30454	0.285801	0.129827	0.29445	HMDB00295	Nucleotide	Pyrimidine Metabolism, Uracil containing
	N-acetylserine	0.169343	0.0612198	-0.0311599	-0.228583	0.27795	0.371887	0.338738	0.059206	0.26924	HMDB02931	Amino Acid	Glycine, Serine and Threonine Metabolism
	alpha-ketoglutaramate*	0.137098	0.0377011	-0.035807	-0.154657	-0.0850627	-0.267839	-0.274773	-0.354297	-0.241577		Amino Acid	Glutamate Metabolism
	urea	0.141723	-0.00629579	-0.0543413	-0.0921888	-0.251256	-0.251256	-0.251256	-0.251256	-0.248481	HMDB00294	Amino Acid	Urea cycle; Arginine and Proline Metabolism
	1-ribosyl-imidazoleacetate*	-0.105041	0.0516466	0.135397	-0.0963763	-0.266755	-0.266755	-0.266755	-0.266755	-0.263162	HMDB02331	Amino Acid	Histidine Metabolism
	sarcosine	0.199529	-0.0913427	0.00831085	-0.140427	-0.303954	-0.303954	-0.303954	-0.303954	-0.297971	HMDB00271	Amino Acid	Glycine, Serine and Threonine Metabolism
	2-aminoadipate	0.182813	0.0217088	-0.064202	-0.162833	-0.33154	-0.33154	-0.33154	-0.33154	-0.325912	HMDB00510	Amino Acid	Lysine Metabolism
	4-hydroxyglutamate	0.219125	0.0354597	-0.113706	-0.173192	-0.341128	-0.341128	-0.341128	-0.341128	-0.33305	HMDB01344	Amino Acid	Glutamate Metabolism
	1-methylhistidine	0.0725156	0.163855	-0.0849527	-0.175666	-0.348058	-0.348058	-0.348058	-0.348058	-0.341996	HMDB00001	Amino Acid	Histidine Metabolism
	methionine sulfone	0.15175	0.0637468	-0.0545968	-0.182715	-0.357268	-0.357268	-0.357268	-0.357268	-0.351814		Amino Acid	Methionine, Cysteine, SAM and Taurine Metabolism
	cystathionine	0.0622028	0.161453	-0.00549746	-0.249253	-0.184251	-0.233788	-0.457654	-0.641738	-0.371584	HMDB00099	Amino Acid	Methionine, Cysteine, SAM and Taurine Metabolism
	pipecolate	0.0908896	0.188782	-0.215243	-0.0988597	-0.393157	-0.393157	-0.393157	-0.393157	-0.38455	HMDB00070	Amino Acid	Lysine Metabolism
	serotonin	-0.00322407	0.277489	-0.0805498	-0.243913	-0.420282	-0.420282	-0.420282	-0.420282	-0.407733	HMDB00259	Amino Acid	Tryptophan Metabolism
	2-methylcitrate/homocitrate	0.0884109	0.0723765	0.0366069	-0.218169	-0.143974	-0.393001	-0.64618	-0.498446	-0.415206		Energy	TCA Cycle
	2-methylbutyrylglycine	-0.00295126	0.0896535	0.128819	-0.243778	-0.431623	-0.431623	-0.431623	-0.431623	-0.424559	HMDB00339	Amino Acid	Leucine, Isoleucine and Valine Metabolism
	1-methylguanidine	0.0895399	0.160517	-0.0357636	-0.246795	-0.432865	-0.432865	-0.432865	-0.432865	-0.424739	HMDB01522	Amino Acid	Guanidino and Acetamido Metabolism
	guanidinoacetate	-0.0441178	-0.258803	0.234013	0.02607	-0.441487	-0.441487	-0.441487	-0.441487	-0.430777	HMDB00128	Amino Acid	Creatine Metabolism
	folate	0.159255	0.149419	-0.0940579	-0.256213	-0.444218	-0.444218	-0.444218	-0.444218	-0.433819	HMDB00121	Cofactors and Vitamins	Folate Metabolism
	3-methylhistidine	0.591126	-0.301695	-0.325606	-0.177367	-0.487657	-0.487657	-0.487657	-0.487657	-0.434271	HMDB00479	Amino Acid	Histidine Metabolism
	6-oxopiperidine-2-carboxylate	0.335905	-0.0732091	-0.0494949	-0.284484	-0.463558	-0.463558	-0.463558	-0.463558	-0.445737	HMDB61705	Amino Acid	Lysine Metabolism
	pro-hydroxy-pro	0.204175	0.157615	-0.139431	-0.278139	-0.466959	-0.466959	-0.466959	-0.466959	-0.453014	HMDB06695	Amino Acid	Urea cycle; Arginine and Proline Metabolism
	3-aminoisobutyrate	0.0992223	0.220891	-0.0762509	-0.295427	-0.486316	-0.486316	-0.486316	-0.486316	-0.473425	HMDB03911	Nucleotide	Pyrimidine Metabolism, Thymine containing
	biliverdin	0.102964	0.178829	-0.0333903	-0.291705	-0.485234	-0.485234	-0.485234	-0.485234	-0.474409	HMDB01008	Cofactors and Vitamins	Hemoglobin and Porphyrin Metabolism
	ophthalmate	0.244355	0.280867	-0.329359	-0.313617	-0.521948	-0.521948	-0.521948	-0.521948	-0.49251	HMDB05765	Amino Acid	Glutathione Metabolism
	phenyllactate (PLA)	0.151749	-0.0230649	0.14159	-0.318642	-0.519814	-0.519814	-0.519814	-0.519814	-0.507723	HMDB00779	Amino Acid	Phenylalanine Metabolism
	2-pyrrolidinone	0.176373	-0.0495367	-0.0432325	-0.0996855	-0.377638	-0.487986	-0.847354	-0.429043	-0.531485	HMDB02039	Amino Acid	Glutamate Metabolism
	5-hydroxylysine	0.00471827	0.342898	-0.0723805	-0.363355	-0.557163	-0.557163	-0.557163	-0.557163	-0.535133	HMDB00450	Amino Acid	Lysine Metabolism
	3-ureidopropionate	0.179595	0.0595495	0.0698789	-0.366494	-0.575451	-0.575451	-0.575451	-0.575451	-0.561083	HMDB00026	Nucleotide	Pyrimidine Metabolism, Uracil containing
	dimethylglycine	0.138571	0.284229	-0.103896	-0.413288	-0.622947	-0.622947	-0.622947	-0.622947	-0.59935	HMDB00092	Amino Acid	Glycine, Serine and Threonine Metabolism
	isobutyrylcarnitine (C4)	0.158345	0.341106	-0.182715	-0.441786	-0.652061	-0.652061	-0.652061	-0.652061	-0.620799	HMDB00736	Amino Acid	Leucine, Isoleucine and Valine Metabolism
	2'-deoxycytidine 5'-monophosphate	0.269216	0.262498	-0.164885	-0.507802	-1.02476	-0.424186	-0.354851	-0.979334	-0.660541	HMDB01202	Nucleotide	Pyrimidine Metabolism, Cytidine containing
	7-methylguanine	0.167473	0.130216	-0.0803074	-0.257395	-0.268231	-0.466841	-0.855986	-1.09688	-0.661982	HMDB00897	Nucleotide	Purine Metabolism, Guanine containing
	3-methoxytyrosine	0.209707	0.153582	0.0368306	-0.503565	-0.740691	-0.740691	-0.740691	-0.740691	-0.71483	HMDB01434	Amino Acid	Tyrosine Metabolism
	1-methyl-4-imidazoleacetate	0.20895	0.309535	-0.124845	-0.540059	-0.775724	-0.775724	-0.775724	-0.775724	-0.73912	HMDB02820	Amino Acid	Histidine Metabolism
	formiminoglutamate	0.292875	0.213856	-0.0932404	-0.561234	-0.803739	-0.803739	-0.803739	-0.803739	-0.766804	HMDB00854	Amino Acid	Histidine Metabolism
	3-indoxyl sulfate	0.170253	0.152125	-0.11399	-0.25238	-0.398313	-0.823783	-0.803096	-1.17961	-0.790202	HMDB00682	Amino Acid	Tryptophan Metabolism
	1-carboxyethylvaline	0.145413	0.350685	-0.194605	-0.424736	-0.899413	-1.11916	-0.749733	-0.544692	-0.797439		Amino Acid	Leucine, Isoleucine and Valine Metabolism
	phenylpyruvate	-0.0300513	0.144919	0.13168	-0.2874	-0.896884	-0.354299	-0.66962	-1.62034	-0.875072	HMDB00205	Amino Acid	Phenylalanine Metabolism
	succinylcarnitine (C4-DC)	0.193315	0.505804	-0.748699	-0.248866	-1.0119	-1.0119	-1.0119	-1.0119	-0.937289	HMDB61717	Energy	TCA Cycle
	C-glycosyltryptophan	0.128837	0.151281	-0.021236	-0.302857	-0.540392	-1.26355	-0.707888	-1.37539	-0.96081		Amino Acid	Tryptophan Metabolism
	3-hydroxy-2-ethylpropionate	-0.0159962	-0.0697521	0.0734239	0.00865022	-0.162863	-1.50212	-1.12879	-1.09373	-0.970959	HMDB00396	Amino Acid	Leucine, Isoleucine and Valine Metabolism
	1-carboxyethylphenylalanine	0.100979	0.115503	-0.0570002	-0.179701	-0.639361	-1.11096	-0.958182	-1.2195	-0.976946		Amino Acid	Phenylalanine Metabolism
	N2,N2-dimethylguanosine	0.126934	0.268692	-0.317807	-0.150359	-0.827202	-1.07851	-1.07851	-1.07851	-0.997545	HMDB04824	Nucleotide	Purine Metabolism, Guanine containing
	homocitrulline	0.141213	0.515709	-0.160856	-0.803449	-1.07975	-1.07975	-1.07975	-1.07975	-1.0029	HMDB00679	Amino Acid	Urea cycle; Arginine and Proline Metabolism
	N1-methyladenosine	0.258952	0.0344807	-0.135974	-0.202327	-0.727392	-0.728796	-1.14322	-1.4864	-1.01024	HMDB03331	Nucleotide	Purine Metabolism, Adenine containing
	pyridoxate	0.0997708	0.0847015	0.0329297	-0.243248	-0.639471	-1.00933	-0.993233	-1.4528	-1.01725	HMDB00017	Cofactors and Vitamins	Vitamin B6 Metabolism
	taurine	0.218887	0.139811	-0.0555439	-0.373006	-1.14895	-0.961958	-0.936676	-1.12196	-1.02492	HMDB00251	Amino Acid	Methionine, Cysteine, SAM and Taurine Metabolism
	kynurenate	0.0932718	0.0950297	-0.0124817	-0.194724	-0.769251	-1.1252	-1.12081	-1.4859	-1.12056	HMDB00715	Amino Acid	Tryptophan Metabolism
	3-(4-hydroxyphenyl)lactate	0.186009	0.136703	-0.0954764	-0.27398	-0.846866	-1.22144	-1.07987	-1.40037	-1.12545	HMDB00755	Amino Acid	Tyrosine Metabolism
	N6-acetyllysine	0.0740138	0.226812	-0.115574	-0.227527	-0.984588	-1.27555	-1.27555	-1.27555	-1.19224	HMDB00206	Amino Acid	Lysine Metabolism
	hypotaurine	0.194309	0.130047	-0.0917797	-0.280808	-1.21939	-1.1355	-1.16353	-1.34295	-1.20328	HMDB00965	Amino Acid	Methionine, Cysteine, SAM and Taurine Metabolism
	N-acetyl-isoputreanine*	0.183736	0.162535	-0.176056	-0.217915	-1.04466	-1.07651	-1.43562	-1.4517	-1.2402		Amino Acid	Polyamine Metabolism
	N-methyl-GABA	0.582426	-0.251799	-0.0642415	-0.501569	-0.724935	-1.6299	-1.6299	-1.32042	-1.26749		Amino Acid	Glutamate Metabolism
	riboflavin (Vitamin B2)	0.0634099	0.124393	0.119449	-0.360863	-1.69869	-0.622837	-1.69869	-1.32464	-1.32281	HMDB00244	Cofactors and Vitamins	Riboflavin Metabolism
	2'-deoxyuridine	0.129653	0.141116	-0.0821654	-0.219988	-0.939719	-1.39571	-1.45138	-1.73537	-1.3727	HMDB00012	Nucleotide	Pyrimidine Metabolism, Uracil containing
	creatine phosphate	0.204294	0.13948	-0.0982631	-0.30007	-1.29134	-1.27148	-1.41482	-1.68771	-1.4027	HMDB01511	Amino Acid	Creatine Metabolism
	2-hydroxybutyrate/2-hydroxyisobutyrate	0.121561	0.16817	-0.105107	-0.219739	-1.35061	-1.37934	-1.31821	-1.66854	-1.4204		Amino Acid	Glutathione Metabolism
	xanthosine	0.156613	0.0317067	0.0782322	-0.308665	-1.94482	-1.57405	-1.23111	-1.7561	-1.61599	HMDB00299	Nucleotide	Purine Metabolism, (Hypo)Xanthine/Inosine containing
	succinate	0.0824527	0.100739	-0.00957792	-0.191858	-1.18856	-1.67491	-1.68955	-1.93719	-1.61799	HMDB00254	Energy	TCA Cycle
	N,N,N-trimethyl-5-aminovalerate	0.0912781	0.117464	-0.00123288	-0.233254	-1.39159	-1.56846	-1.72197	-1.89039	-1.63667		Amino Acid	Lysine Metabolism
	creatine	0.122333	0.0416779	-0.0343092	-0.1429	-1.35164	-1.44246	-1.82512	-2.0005	-1.65163	HMDB00064	Amino Acid	Creatine Metabolism
	alpha-hydroxyisovalerate	0.0379391	0.16399	-0.0211358	-0.205038	-1.41933	-1.57564	-1.88407	-1.97879	-1.7084	HMDB00407	Amino Acid	Leucine, Isoleucine and Valine Metabolism
	dimethylarginine (SDMA + ADMA)	0.0783062	0.182605	-0.154693	-0.134529	-1.43549	-1.65075	-1.89448	-2.0562	-1.75215	HMDB01539	Amino Acid	Urea cycle; Arginine and Proline Metabolism
	pantothenate	0.226884	0.111922	-0.0544408	-0.347287	-1.54042	-1.5451	-1.83159	-2.15498	-1.75229	HMDB00210	Cofactors and Vitamins	Pantothenate and CoA Metabolism
	trigonelline (N'-methylnicotinate)	0.335295	0.0204566	-0.10026	-0.337851	-1.95908	-1.95908	-1.5126	-1.95908	-1.82687	HMDB00875	Cofactors and Vitamins	Nicotinate and Nicotinamide Metabolism
	2,3-dihydroxy-5-methylthio-4-pentenoate (DMTPA)*	0.138875	0.0928589	-0.0244225	-0.235724	-1.56312	-1.99924	-1.8656	-2.01148	-1.85276		Amino Acid	Methionine, Cysteine, SAM and Taurine Metabolism
	2-methylbutyrylcarnitine (C5)	0.846629	0.338093	-0.696702	-1.64098	-2.14187	-2.14187	-2.14187	-2.14187	-1.85363	HMDB00378	Amino Acid	Leucine, Isoleucine and Valine Metabolism
	lanthionine	0.31224	0.123793	-0.353995	-0.174041	-1.6426	-1.75157	-2.22742	-2.22742	-1.93925		Amino Acid	Methionine, Cysteine, SAM and Taurine Metabolism
	N-acetyltaurine	0.172037	0.160535	-0.0847484	-0.299203	-1.84896	-1.97183	-2.0217	-1.97838	-1.94237		Amino Acid	Methionine, Cysteine, SAM and Taurine Metabolism
	imidazole lactate	0.107526	0.101875	0.0304527	-0.272087	-1.78505	-1.60293	-2.33866	-2.33866	-2.00827	HMDB02320	Amino Acid	Histidine Metabolism
	N6-carbamoylthreonyladenosine	0.140813	0.058139	-0.019527	-0.201251	-1.53867	-2.28261	-1.94356	-2.29021	-2.00831	HMDB41623	Nucleotide	Purine Metabolism, Adenine containing
	pseudouridine	-0.205262	-0.200852	0.331283	0.00640553	-1.31906	-1.71276	-2.62236	-2.87888	-2.11616	HMDB00767	Nucleotide	Pyrimidine Metabolism, Uracil containing
	threonate	0.501494	-0.301684	-0.641594	0.178889	-1.53346	-3.42995	-1.40021	-2.76134	-2.21552	HMDB00943	Cofactors and Vitamins	Ascorbate and Aldarate Metabolism
	ethylmalonate	0.202696	0.175196	-0.202039	-0.233253	-0.0974356	-3.24676	-3.24676	-2.3544	-2.22199	HMDB00622	Amino Acid	Leucine, Isoleucine and Valine Metabolism
	uracil	0.140771	0.142193	-0.157764	-0.155998	-1.76779	-3.17909	-2.32118	-3.17909	-2.60409	HMDB00300	Nucleotide	Pyrimidine Metabolism, Uracil containing
	N6,N6,N6-trimethyllysine	0.10571	0.27717	-0.0683783	-0.398873	-3.15327	-3.36325	-3.35311	-3.83808	-3.40584	HMDB01325	Amino Acid	Lysine Metabolism
	xanthine	0.229599	0.22899	-0.203817	-0.34515	-3.33536	-3.78785	-3.47571	-3.80356	-3.57803	HMDB00292	Nucleotide	Purine Metabolism, (Hypo)Xanthine/Inosine containing
	3-hydroxyisobutyrate	0.299434	-0.0359829	-0.139672	-0.174221	-4.16977	-2.77266	-4.16977	-4.16977	-3.80788	HMDB00336	Amino Acid	Leucine, Isoleucine and Valine Metabolism
	5,6-dihydrouridine	-0.0923105	-0.0363324	0.201993	-0.0945511	-2.79997	-3.58039	-4.49396	-4.61622	-3.86733		Nucleotide	Pyrimidine Metabolism, Uracil containing
	imidazole propionate	0.422842	0.127407	-0.252857	-0.458241	-3.15996	-5.07429	-5.07429	-3.21041	-4.08953	HMDB02271	Amino Acid	Histidine Metabolism
	5-(galactosylhydroxy)-L-lysine	0.139273	0.365869	-0.266935	-0.360474	-4.1312	-4.1312	-4.1312	-4.1312	-4.10063		Amino Acid	Lysine Metabolism
	homoarginine	0.147274	0.218081	-0.235405	-0.1846	-4.19131	-4.19131	-4.19131	-4.19131	-4.17765	HMDB00670	Amino Acid	Urea cycle; Arginine and Proline Metabolism
	betaine	0.13523	0.17502	-0.123768	-0.226062	-4.26734	-4.6178	-4.29599	-4.87655	-4.50453	HMDB00043	Amino Acid	Glycine, Serine and Threonine Metabolism
	N-delta-acetylornithine	0.0691807	0.142005	-0.0258458	-0.208899	-4.35782	-4.772	-5.08448	-5.08448	-4.81881		Amino Acid	Urea cycle; Arginine and Proline Metabolism
	3-methylglutaconate	0.106688	0.199338	-0.091765	-0.257217	-4.72558	-4.70034	-4.89625	-5.17991	-4.86478	HMDB00522	Amino Acid	Leucine, Isoleucine and Valine Metabolism
	urate	0.116024	0.204263	-0.123537	-0.240889	-4.99595	-4.99595	-4.99595	-4.99595	-4.98492	HMDB00289	Nucleotide	Purine Metabolism, (Hypo)Xanthine/Inosine containing
	4-acetamidobutanoate	0.301709	0.147144	-0.135228	-0.416008	-5.98198	-3.22602	-5.98198	-5.98198	-5.26739	HMDB03681	Amino Acid	Polyamine Metabolism
	carnosine	0.19402	0.172547	-0.165144	-0.256413	-5.27554	-5.47857	-5.0574	-5.57049	-5.33175	HMDB00033	Amino Acid	Histidine Metabolism
	N-methylproline	-0.0851597	0.682658	-0.276953	-0.673707	-3.36659	-6.11593	-6.11593	-6.11593	-5.34031		Amino Acid	Urea cycle; Arginine and Proline Metabolism
	creatinine	0.149106	0.163602	-0.105868	-0.248465	-5.38489	-5.4672	-5.82996	-6.05919	-5.67491	HMDB00562	Amino Acid	Creatine Metabolism
	citrulline	0.13624	0.171414	-0.0930687	-0.256227	-7.14622	-7.14622	-7.06283	-7.14622	-7.11496	HMDB00904	Amino Acid	Urea cycle; Arginine and Proline Metabolism
	allantoin	0.124932	0.151601	-0.091718	-0.217025	-6.80113	-6.94167	-7.35113	-7.40778	-7.11738	HMDB00462	Nucleotide	Purine Metabolism, (Hypo)Xanthine/Inosine containing
