# Supplementary material for: The Folate Cycle Enzyme MTHFR Is a Critical Regulator of Cell Response to MYC-Targeting Therapies
Source: Oxford University Press journal article supplement (doi:10.1158/2159-8290.cd-19-0970), 2020-08-21
Supplement: 21598290cd190970-sup-227491_2_supp_6471610_q113g3.xlsx [file 21598290cd190970-sup-227491_2_supp_6471610_q113g3.xlsx]

## Sheet: Sheet1
	Table S1: List of metabolic gene sets queried using ssGSEA on the two cohorts of patients with AML (TCGA-LAML and GSE14468).
	SOURCE	DATASET NAME		GENE NAME
	KEGG	KEGG_VALINE_LEUCINE_AND_ISOLEUCINE_BIOSYNTHESIS	> Valine, leucine and isoleucine biosynthesis	BCAT1	BCAT2	IARS	IARS2	LARS	LARS2	PDHA1	PDHA2	PDHB	VARS	VARS2
	KEGG	KEGG_PURINE_METABOLISM	> Purine metabolism	ADA	ADCY1	ADCY10	ADCY2	ADCY3	ADCY4	ADCY5	ADCY6	ADCY7	ADCY8	ADCY9	ADK	ADSL	ADSS	ADSSL1	AK1	AK2	AK4	AK5	AK7	ALLC	AMPD1	AMPD2	AMPD3	APRT	ATIC	C17orf48	CANT1	DCK	DGUOK	ENPP1	ENPP3	ENTPD1	ENTPD2	ENTPD3	ENTPD4	ENTPD5	ENTPD6	ENTPD8	FHIT	GART	GDA	GMPR	GMPR2	GMPS	GUCY1A2
	KEGG	KEGG_ONE_CARBON_POOL_BY_FOLATE	> One carbon pool by folate	ALDH1L1	AMT	ATIC	DHFR	FTCD	GART	MTFMT	MTHFD1	MTHFD1L	MTHFD2	MTHFD2L	MTHFR	MTHFS	MTR	SHMT1	SHMT2	TYMS
	KEGG	KEGG_PYRIMIDINE_METABOLISM	> Pyrimidine metabolism	AK3	CAD	CANT1	CDA	CMPK1	CMPK2	CTPS	CTPS2	DCK	DCTD	DHODH	DPYD	DPYS	DTYMK	DUT	ENTPD1	ENTPD3	ENTPD4	ENTPD5	ENTPD6	ENTPD8	ITPA	NME1	NME1-NME2	NME2	NME3	NME4	NME5	NME6	NME7	NT5C	NT5C1A	NT5C1B	NT5C2	NT5C3	NT5E	NT5M	NUDT2	PNP	PNPT1	POLA1	POLA2	POLD1	POLD2	POLD3	POLD4
	KEGG	KEGG_CYSTEINE_AND_METHIONINE_METABOLISM	> Cysteine and methionine metabolism	ADI1	AHCY	AHCYL1	AHCYL2	AMD1	APIP	BHMT	CBS	CDO1	CTH	DNMT1	DNMT3A	DNMT3B	DNMT3L	ENOPH1	GOT1	GOT2	IL4I1	LDHA	LDHAL6A	LDHAL6B	LDHB	LDHC	MAT1A	MAT2A	MAT2B	MPST	MTAP	MTR	SDS	SMS	SRM	TAT	TRDMT1
	KEGG	KEGG_ALANINE_ASPARTATE_AND_GLUTAMATE_METABOLISM	> Alanine, aspartate and glutamate metabolism	ABAT	ACY3	ADSL	ADSS	ADSSL1	AGXT	AGXT2	ALDH4A1	ALDH5A1	ASL	ASNS	ASPA	ASS1	CAD	CPS1	DDO	GAD1	GAD2	GFPT1	GFPT2	GLS	GLS2	GLUD1	GLUD2	GLUL	GOT1	GOT2	GPT	GPT2	IL4I1	NIT2	PPAT
	KEGG	KEGG_LYSINE_DEGRADATION	> Lysine degradation	AADAT	AASDH	AASDHPPT	AASS	ACAT1	ACAT2	ALDH1B1	ALDH2	ALDH3A2	ALDH7A1	ALDH9A1	ASH1L	BBOX1	DLST	DOT1L	ECHS1	EHHADH	EHMT1	EHMT2	GCDH	HADH	HADHA	NSD1	OGDH	OGDHL	PIPOX	PLOD1	PLOD2	PLOD3	SETD1A	SETD1B	SETD2	SETD7	SETD8	SETDB1	SETDB2	SETMAR	SUV39H1	SUV39H2	SUV420H1	SUV420H2	TMLHE	WHSC1	WHSC1L1
	KEGG	KEGG_ARGININE_AND_PROLINE_METABOLISM	> Arginine and proline metabolism	ABP1	ACY1	ADC	AGMAT	ALDH18A1	ALDH1B1	ALDH2	ALDH3A2	ALDH4A1	ALDH7A1	ALDH9A1	AMD1	ARG1	ARG2	ASL	ASS1	CKB	CKM	CKMT1A	CKMT1B	CKMT2	CPS1	DAO	GAMT	GATM	GLS	GLS2	GLUD1	GLUD2	GLUL	GOT1	GOT2	LAP3	MAOA	MAOB	NAGS	NOS1	NOS2	NOS3	OAT	ODC1	OTC	P4HA1	P4HA2	P4HA3	PRODH
	KEGG	KEGG_VALINE_LEUCINE_AND_ISOLEUCINE_DEGRADATION	> Valine, leucine and isoleucine degradation	ABAT	ACAA1	ACAA2	ACAD8	ACADM	ACADS	ACADSB	ACAT1	ACAT2	ALDH1B1	ALDH2	ALDH3A2	ALDH6A1	ALDH7A1	ALDH9A1	AOX1	AUH	BCAT1	BCAT2	BCKDHA	BCKDHB	DBT	DLD	ECHS1	EHHADH	HADH	HADHA	HADHB	HIBADH	HIBCH	HMGCL	HMGCS1	HMGCS2	HSD17B10	IL4I1	IVD	MCCC1	MCCC2	MCEE	MUT	OXCT1	OXCT2	PCCA	PCCB
	KEGG	KEGG_GLYCINE_SERINE_AND_THREONINE_METABOLISM	> Glycine, serine and threonine metabolism	AGXT	AGXT2	ALAS1	ALAS2	AMT	AOC2	AOC3	BHMT	CBS	CHDH	CTH	DAO	DLD	DMGDH	GAMT	GATM	GCAT	GLDC	GLYCTK	GNMT	MAOA	MAOB	PHGDH	PIPOX	PSAT1	PSPH	SARDH	SDS	SHMT1	SHMT2	SRR
	KEGG	KEGG_BETA_ALANINE_METABOLISM	> beta-Alanine metabolism	ABAT	ACADM	ALDH1B1	ALDH2	ALDH3A2	ALDH7A1	ALDH9A1	AOC2	AOC3	CNDP1	DPYD	DPYS	ECHS1	EHHADH	GAD1	GAD2	HADHA	HIBCH	MLYCD	SMS	SRM	UPB1
	KEGG	KEGG_TRYPTOPHAN_METABOLISM	> Tryptophan metabolism	AADAT	AANAT	ABP1	ACAT1	ACAT2	ACMSD	AFMID	ALDH1B1	ALDH2	ALDH3A2	ALDH7A1	ALDH9A1	AOX1	ASMT	CAT	CYP1A1	CYP1A2	CYP1B1	DDC	ECHS1	EHHADH	GCDH	HAAO	HADH	HADHA	IDO1	IDO2	IL4I1	INMT	KMO	KYNU	MAOA	MAOB	OGDH	OGDHL	TDO2	TPH1	TPH2	WARS	WARS2
	KEGG	KEGG_FOLATE_BIOSYNTHESIS	> Folate biosynthesis	ALPI	ALPL	ALPP	ALPPL2	DHFR	FPGS	GCH1	GGH	PTS	QDPR	SPR
	KEGG	KEGG_HISTIDINE_METABOLISM	> Histidine metabolism	ABP1	ACY3	ALDH1A3	ALDH1B1	ALDH2	ALDH3A1	ALDH3A2	ALDH3B1	ALDH3B2	ALDH7A1	ALDH9A1	AMDHD1	ASPA	CNDP1	DDC	FTCD	HAL	HDC	HEMK1	HNMT	LCMT1	LCMT2	MAOA	MAOB	METTL2B	METTL6	TRMT11	UROC1	WBSCR22
	KEGG	KEGG_PHENYLALANINE_METABOLISM	> Phenylalanine metabolism	ALDH1A3	ALDH3A1	ALDH3B1	ALDH3B2	AOC2	AOC3	DDC	GOT1	GOT2	HPD	IL4I1	MAOA	MAOB	MIF	NAT6	PAH	PRDX6	TAT
	CURATED_BIOCYC	PURINE_DE NOVO_BIOSYNTHESIS	> purine de novo biosynthesis	PPAT	GART	PFAS	PAICS	ADSL	ATIC	ADSS	ADSSL1	IMPDH1	IMPDH2	GMPS	GUK1	NME1	NME2	NME3	NME4	NME5	NME6	NME7	NME2P1	RRM1	RRM2	RRM2B	AK8	AK3	AK7	AK4	AK1	AK2	AK5
	CURATED_BIOCYC	TETRAHYDROFOLATE_SALVAGE	> tetrahydrofolate salvage	GART	MTHFD1	MTHFD1L	MTHFD2	MTHFS	ALDH1L1	ALDH1L2	MTHFD2L	FPGS	ATIC
	CURATED_BIOCYC	PURINE_SALVAGE	> purine salvage	ADA	PNP	APRT	HPRT1	ADK	IMPDH1	IMPDH2	GMPS	GUK1	NME7	NME6	NME2P1	NME4	NME3	NME2	NME1	NME5	ADSSL1	ADSS	ADSL	AK8	AMP	AK3	AK7	AK4	AK1	AK2	AK5	RRM1	RRM2	RRM2B
	CURATED_BIOCYC	METHIONINE_SALVAGE	> methionine salvage	CCBL1	MAT1A	MAT2B	MTA2A	AMS1	SRM	MTAP	MRI1	APIP	ENOPH1	ADI1	AMD1
	CURATED_BIOCYC	PYRIMIDINE_BIOSYNTHESIS_FROM_UDP	> pyrimidine biosynthesis from udp	RRM1	RRM2	RRM2B	DUT	ENPP3	ENPP1	ITPA	TYMS	DTYMK	NME1	NME2	NME3	NME4	NME5	NME6	NME7	NME2P1	CAD	DHODH	UMPS	ENTPD6	ENTPD5	ENTPD4	CANT1	CMPK2	CMPK1	ENTPD1	ENTPD3	ENTPD8	UPRT	UCKL1	UCK2	UCK1
	CURATED_BIOCYC	PYRIMIDINE_BIOSYNTHESIS_FROM_CTP	> pyrimidine biosynthesis from ctp	CANT1	NTPCR	RRM1	RRM2	RRM2B	NME1	NME2	NME3	NME4	NME5	NME6	NME7	NME2P1	CAD	DHODH	UMPS	NT5C1B-RDH14	NT5C3B	NT5C2	NT5C	NT5E	NT5C3A	NT5M	NT5C1A	NT5C1B	CDA	CMPK1	CMPK2	ENTPD1	ENTPD3	ENTPD8	DCK	DCTPP1
	CURATED_BIOCYC	METHIONINE_METABOLISM	> methionine metabolism	CHDH	ALDH7A1	MTR	BHMT	BHMT2	MAT2B	MAT2A	MTA1A	AHCY	CCBL1
	CURATED_BIOCYC	GLUTAMATE_METABOLISM	> glutamate metabolism	RIMKLB	NIT2	GLUD1	GLUD2	GAD1	GAD2	ABAT	ALDH5A1	GLUL	GFPT1	GFPT2	PPAT	CAD	GLS2	GLS	ADLH4A1	CPS1	PPAT
	CURATED_BIOCYC	PROLINE_METABOLISM	> proline metabolism	GLUL	GLS2	GLS1	ALDH18A1	PYCR1	P5CR2	ALDH4A1	OAT	PYCR2	PYCR3	P4HA2	P4HA1	P4HB	P4HTM	P4HA3	PRODH2	GOT2	HOGA1
	CURATED_BIOCYC	ARGININE_METABOLISM	> arginine metabolism	AMD1	SRM	ARG1	ARG2	ODC1	SLC7A1	ASL	ASS1	OTC	NOS1	NOS2	NOS3	OAT	AZIN2	AGMAT	GATM	GAMT	CKB	CKM	CKMT1B	CKMT1A	CKMT2
	CURATED_BIOCYC	LEUCINE_CATABOLISM	> leucine catabolism	BCAT2	BCAT1	BCKDHB	BCKDHA	DBT	DLD	IVD	MCCC2	MCCC1	AUH	HMGCLL1	HMGCL	BCKDK
	CURATED_BIOCYC	ISOLEUCINE_CATABOLISM	> isoleucine catabolism	BCAT2	BCAT1	BCKDHB	BCKDHA	DBT	DLD	ACADSB	ECHS1	HADHA	HSD17B10	ACAT2	ACAT1	BCKDK
	CURATED_BIOCYC	FOLATE_CYCLE	> folate cycle	DHFR	MTHFR	MTR	SHMT1	SHMT2	DHFR2	FPGS	GGH	GNMT	TYMS	FOLH1	SLC46A1	SLC19A1
	CURATED_BIOCYC	ASPARTATE_METABOLISM	> aspartate metabolism	GPT2	GPT	AGXT	AGXT2	GOT1L1	GOT1	ASNS	AGA	ASPG	ASRGL1	MDH1	MDH2	ADSSL1	ADSS	ADSL	ASL	DDO	IL4I1	NIT2	ASPA	NAT8L	CAD	RIMKLA	RIMKLB	FOLH1
	CURATED_BIOCYC	PURINE_DEOX_SALVAGE	> purine deoxyribonucleosides salvage	DGUOK	DCK	GUK1	NME7	NME6	NME2P1	NME4	NME3	NME1	NME2	NME5	AK5
	CURATED_BIOCYC	TYROSINE_METABOLISM	> tyrosine metabolism	QDPR	PAH	PCBD1	PCBD2	TAT	HPD	HGD	GSTZ1	FAH	FH	TH	DDC	TYR	DBH	PNMT	COMT
	CURATED_BIOCYC	LYSINE_CATABOLISM	> lysine catabolism	IL4I1	CRYM	PYCR1	PIPOX	ALDH7A1	AADAT	DHTKD1	AASS	PHYKPL	HYKK	PLOD1	PLOD2	PLOD3	COLGALT1	COLGALT2	TMLHE	ALDH2	ALDH1B1	ALDH9A1	ALDH3A2	BBOX1	OGDH	OGDHL	DLST	GCDH	ECHS1	EHHADH	HADH	ACAT1	ACAT2
	CURATED_BIOCYC	TRYPTOPHAN_CATABOLISM	> tryptophan catabolism	TDO2	IDO2	IDO1	AFMID	KMO	KYNU	HAAO	ACMSD	DHTKD1	GCDH	ECHS1	HADH	HSD17B10	ACAT2	ACAT1	DDC	MAOB	ALDH3A2	ALDH3B1	AKR1A1	TPH1	TPH2	DC	MAOA
	CURATED_BIOCYC	GLYCINE_METABOLISM	> glycine metabolism	PHGDH	PSAT1	VPS29	PSPH	SHMT1	SHMT2	AGXT2	AGXT	DLD	GLDC	AMT	BHMT	DMGDH	SARDH	ALAS2	ALAS1	ALAD	HMBS	UROS	GCAT	MAOA	MAOB	AOC2	AOC3
	CURATED_BIOCYC	SERINE_METABOLISM	> serine metabolism	PTDSS1	PTDSS2	PHGDH	PSAT1	VPS29	PSPH	SHMT1	SHMT2	CHDH	ALDH7A1	BHMT	SARDH	DMGDH	SDSL	SDS
	CURATED_BIOCYC	THREONINE_METABOLISM	> threonine metabolism	SDS	SDSL	BCKDHB	BCKDHA	DBT	DLD	GCAT	MAOA	MAOB	AOC2	AOC3
	CURATED_BIOCYC	PHENYLALANINE_METABOLISM	> phenylalanine metabolism	PCBD1	PCBD2	QDPR	PAH	GCH1	PTS	SPR	IL4I1	TAT	GOT1	GOT2	DDC	MAOA	MAOB	AOC2	AOC3	ALDH3A1	ALDH1A3	ALDH3B2	MIF
	CURATED_BIOCYC	HISTIDINE_METABOLISM	> histidine metabolism	HAL	UROC1	AMDHD1	FTCD	HDC	CNDP2	CNDP1	CARNMT1	CARNS1	HNMT	MAOA	MAOB	ALDH3A1	ALDH1A3	ALDH3B1	ALDH3B2	AOC1	ALDH2	ALDH1B1	ALDH9A1	ALDH3A2	ALDH7A1	ASPA	ABP1	DPH5	ATPBD4
	CURATED_BIOCYC	PYRIMIDINE_SALVAGE	> pyrimidine salvage	DCK	CDA	TK1	TK2	TYMS	UCKL1	UCK1	UCK2	TYMP	UPP1
	CURATED_BIOCYC	BETA_ALANINE_METABOLISM	> beta alanine metabolism	ABAT	ALDH6A1	CARNS1	CNDP1	CNDP2	GAD1	GAD2	GADL1	UPB1	DPYS	DPYD	MLYCD
[truncated: 113 more columns]
